# Supplementary material for: TNF-Alpha Promotes an Inflammatory Mammary Microenvironment That Favors Macrophage and Epithelial Migration in a CCL2- and Mitochondrial-ROS-Dependent Manner
Source: MDPI journal article supplement (doi:10.3390/antiox12040813), 2023-03-27
Supplement: s1 [file s1]

# TNF-alpha promotes an inflammatory mammary microenvironment that favors macrophage and epithelial migration in a CCL2 and mitochondrial ROS-dependent manner.

María Jesús Vera <sup>1,4</sup>, Francisco Guajardo <sup>2,3,4</sup>, Felix A. Urra <sup>2,3,4</sup>, Nicolás Tobar <sup>1\*</sup> and Jorge Martínez <sup>1,4,\*</sup>

Supplementary Figure S1.

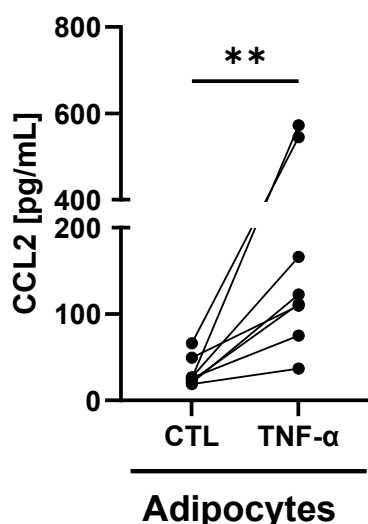

**Figure S1. TNF $\alpha$  stimulates the expression of CCL2 in differentiated mammary adipocytes.** Preadipocytes derived from mammary tissue from eight healthy patients were differentiated for 14 days and treated with TNF $\alpha$  (20 ng/ml) for 72 h. Then differentiated mammary adipocytes was allowing to conditioned media for 24 hours. Expression of MCP1/CCL2 was analyzed using an ELISA assay as indicated in material and method. Data correspond to the mean  $\pm$  SD. Paired Wilcoxon test was used to deriving p values. (\*\*) corresponding to  $p < 0.01$ .
